# Supplementary material for: Structures, influences, and formation mechanism of planar defects on (100), (001) and (−201) planes in β-Ga2O3 crystals
Source: Royal Society of Chemistry journal article supplement (doi:10.1039/d3cp04305c), 2024-01-01
Supplement: d3cp04305c1.pdf [file d3cp04305c1.pdf]

## Supporting Information

### Structures, influences and formation mechanism of planar defects on (100), (001) and (-201) planes in $\beta$ -Ga<sub>2</sub>O<sub>3</sub> crystals

Qi Li<sup>a</sup>, Xin Guan<sup>a</sup>, Yu Zhong<sup>a</sup>, Zhitai Jia<sup>a,b\*</sup>, Yang Li<sup>a\*</sup>, Na Lin<sup>a\*</sup>

<sup>a</sup> State Key Laboratory of Crystal Materials, Institute of Novel Semiconductors, Institute of Crystal materials, Shandong University, Jinan, Shandong, 250100, China.

<sup>b</sup> Shandong Research Institute of Industrial Technology, Jinan, Shandong, 250100, China.

**Table S1** The lattice constants, number of atoms, sectional areas A, and chosen k-point meshes of the different type of TB and SF supercells with lowest energy.

|             | Lattice constants / Å | Number of atoms | Sectional areas / Å <sup>2</sup> | K-point meshes |
|-------------|-----------------------|-----------------|----------------------------------|----------------|
| (100)-twin  | a=24.8, b=3.1, c=5.9  | 40              | 18.2                             | 1 × 8 × 4      |
| (001)-twin  | a=11.9, b=3.0, c=11.9 | 40              | 35.9                             | 2 × 8 × 2      |
| (-201)-twin | a=14.8, b=3.1, c=24.0 | 80              | 45.5                             | 2 × 8 × 1      |
| (100)-SF    | a=48.5, b=3.1, c=5.9  | 80              | 18.4                             | 1 × 8 × 4      |
| (001)-SF    | a=12.3, b=3.1, c=14.7 | 50              | 37.6                             | 2 × 8 × 2      |
| (-201)-SF   | a=14.8, b=3.1, c=21.4 | 70              | 45.9                             | 2 × 8 × 1      |

The supercell structure with the lowest energy among each type of TBs and SFs is provided in the format of VASP POSCAR:

### 1. (100)-twin A

```
(100)twin A
  1.000000000000000
  24.8243170083357292  0.000000000000000  0.0228692036324418
  0.000000000000000  3.0851922584475568  0.000000000000000
  -1.4031753291568423  0.000000000000000  5.7206929828013751
Ga  O
  16  24
Direct
  0.0460024252296665 -0.000000000000000  0.7998730583390160
  0.4544975201323013 -0.000000000000000  0.2081556268162630
  0.2959153124443955  0.500000000000000  0.2974456967593976
  0.1704778933453332 -0.000000000000000  0.1621095966523232
  0.0800065850363250  0.500000000000000  0.3504848552860686
  0.4204663876327736  0.500000000000000  0.6575686825369303
  0.3299864841456890 -0.000000000000000  0.8461309412467412
  0.2045383656189732  0.500000000000000  0.7108045671140553
  0.9544818833952942 -0.000000000000000  0.2077713734922328
  0.7959701296841123  0.500000000000000  0.8013314512739664
  0.7045764524512524  0.500000000000000  0.2051321908485884
  0.5800453438804526  0.500000000000000  0.3164250349115698
  0.9204619267705364  0.500000000000000  0.6903218935531028
  0.8300160344031903  0.000000000000000  0.3207388854671656
  0.6705359005822169 -0.000000000000000  0.6857285874913422
  0.5460228587203588 -0.000000000000000  0.7989950500743837
  0.0863405473846155 -0.000000000000000  0.1185372280475994
  0.4141341837465090 -0.000000000000000  0.8895131777719281
  0.3342462307400625  0.500000000000000  0.0592972074698359
  0.1662043427583500  0.500000000000000  0.9489265293001699
  0.0849994068331084 -0.000000000000000  0.5640426578097364
  0.4154802158005610 -0.000000000000000  0.4439499656311614
  0.3366760559108872  0.500000000000000  0.6157321804347818
  0.1637954902762299  0.500000000000000  0.3924866394224990
  0.4986180456741764  0.500000000000000  0.2490050501078979
  0.0018870333488716  0.500000000000000  0.7585451706681409
  0.2518946992706859 -0.000000000000000  0.2622319991810235
  0.2485635257112753 -0.000000000000000  0.7460746441253862
  0.5850426451163855 -0.000000000000000  0.1128577486598159
  0.9154461633451583 -0.000000000000000  0.8939232862603271
  0.8343043346128650  0.500000000000000  0.1161295849247771
  0.6662600366033048  0.500000000000000  0.8903243083715306
  0.5863873168241749 -0.000000000000000  0.5610652110555365
  0.9141445747751827 -0.000000000000000  0.4457493938442407
  0.8366869675581509  0.500000000000000  0.5644639108863435
  0.6638443106585318  0.500000000000000  0.4419777912569429
  0.9985806250884940  0.500000000000000  0.2550916431956690
  0.5019136558587245  0.500000000000000  0.7521940842936865
  0.7485979055783726 -0.000000000000000  0.2578470548416812
  0.7519501760524455 -0.000000000000000  0.7483961025761379
```

### 2. (001)-twin A

```
(001)twin A
  1.000000000000000
  11.8972204261877437  0.0431052792284225  0.0299463475721164
  0.0107217870946489  3.0169726329344018  0.0137730950731528
  -2.6730654179367681  0.0429571757215096  11.6306119732467668
Ga  O
  16  24
Direct
  0.1084125269526454  0.9719432375593693  0.4128098608304431
  0.0660129553875448  0.0657115220505283  0.1407643110265831
```

|                    |                    |                    |
|--------------------|--------------------|--------------------|
| 0.6596205450497228 | 0.9827361035368188 | 0.4262644144211479 |
| 0.5215474554975025 | 0.4823227901228924 | 0.2246927149317913 |
| 0.8096280042145423 | 0.9098991455719851 | 0.0841377604707690 |
| 0.3355337740063278 | 0.9953966669357277 | 0.3283656846416690 |
| 0.3351776090365617 | 0.9892129694322239 | 0.0754054531683229 |
| 0.9156493288671502 | 0.9825228487898130 | 0.6038563468912220 |
| 0.8492792239714174 | 0.4862646639369776 | 0.3378857500936866 |
| 0.0918704778937311 | 0.9438783498810499 | 0.8911061966200269 |
| 0.6079833466438813 | 0.4529677624394293 | 0.9147032437710034 |
| 0.3956232253492825 | 0.4848862983768342 | 0.5849089475341364 |
| 0.1733055238794232 | 0.4734689996006198 | 0.6645893704043422 |
| 0.8353833361395241 | 0.4664196092236113 | 0.8328343588386159 |
| 0.6507729428281052 | 0.9739997602924166 | 0.6613642701294500 |
| 0.3532920361884965 | 0.9704536769873765 | 0.8414677043991644 |
| 0.7055106430656489 | 0.4265116868080600 | 0.0610344095080855 |
| 0.3211012703879347 | 0.4919682267678112 | 0.4295638664366115 |
| 0.1697722766813933 | 0.9988514774647399 | 0.0422899789567883 |
| 0.8318335883342337 | 0.9816386178170387 | 0.4531945753296142 |
| 0.0158027041639201 | 0.4756658605688110 | 0.4047751978482365 |
| 0.3419104066385200 | 0.4874647815335677 | 0.1990790325435723 |
| 0.5007481282331020 | 0.9854001098095054 | 0.3420354032522783 |
| 0.861099522638509  | 0.9902162583444255 | 0.2419955428624138 |
| 0.9712516079986515 | 0.5659770484426011 | 0.1036230947591045 |
| 0.1679617986213927 | 0.9919593714434991 | 0.2813666234896181 |
| 0.5013303680599154 | 0.9842307755768946 | 0.1198297458545496 |
| 0.6778464215732976 | 0.4860869468563049 | 0.3196566344530493 |
| 0.1986174627963140 | 0.9752175888087017 | 0.5649732992499522 |
| 0.8157756899673232 | 0.9641313983559495 | 0.9269538159073175 |
| 0.6633393050236552 | 0.4790003324926525 | 0.5448149031297608 |
| 0.3311329681926912 | 0.4796072957813087 | 0.9524269162241491 |
| 0.1813905675839497 | 0.9703044139393177 | 0.7800974185911037 |
| 0.8237101243476301 | 0.9703499492915728 | 0.7126793694366957 |
| 0.6610419433029754 | 0.4697350495384203 | 0.7716546919170880 |
| 0.3444699049142682 | 0.4715435221455061 | 0.7277336069126887 |
| 0.0080421828331776 | 0.4789726910807240 | 0.6332371935621639 |
| 0.0003587612880332 | 0.4496502295821904 | 0.8633199017342091 |
| 0.4877585065221967 | 0.9811626686649143 | 0.6077507075233599 |
| 0.5166012003000943 | 0.9574292831478011 | 0.8853676313452090 |

### 3. (-201)-twin A

(-201)twin A

|                     |                    |                     |
|---------------------|--------------------|---------------------|
| 1.0000000000000000  |                    |                     |
| 14.7969927929548355 | 0.0000000000000000 | 0.2454274350099350  |
| 0.0000000000000000  | 3.0726568240606373 | 0.0000000000000000  |
| 14.4696306041946183 | 0.0000000000000000 | 19.1551689839524961 |

Ga O  
32 48

Direct

|                    |                    |                    |
|--------------------|--------------------|--------------------|
| 0.6132697805260490 | 0.5000000000000000 | 0.6605675407783701 |
| 0.3084833179085092 | 0.0000000000000000 | 0.2604839260831716 |
| 0.6742838867676498 | 0.0000000000000000 | 0.7604527541754268 |
| 0.1132657860521732 | 0.0000000000000000 | 0.6605705483827583 |
| 0.9142136817231634 | 0.0000000000000000 | 0.8574152916028583 |
| 0.1742855966866315 | 0.5000000000000000 | 0.7604523416945336 |
| 0.4142117067432841 | 0.5000000000000000 | 0.8574165125297079 |
| 0.5974903947254091 | 0.5000000000000000 | 0.9129913024155822 |
| 0.8578985828196536 | 0.5000000000000000 | 0.7574640700044047 |
| 0.0974896810912925 | 0.0000000000000000 | 0.9129908414634590 |
| 0.3579029896142563 | 0.0000000000000000 | 0.7574619404391839 |
| 0.8916353754359044 | 0.0000000000000000 | 0.1186756008904958 |
| 0.3413373302442936 | 0.0000000000000000 | 0.0129717827965953 |
| 0.3916352744976181 | 0.5000000000000000 | 0.1186794254639085 |
| 0.8413380683975608 | 0.5000000000000000 | 0.0129677334705208 |
| 0.1576530278284396 | 0.5000000000000000 | 0.0085847196109069 |
| 0.6576508326276506 | 0.0000000000000000 | 0.0085853448953256 |
| 0.8746092740054345 | 0.5000000000000000 | 0.6186621576973091 |
| 0.3746098812024810 | 0.0000000000000000 | 0.6186612433938323 |
| 0.6361293986206771 | 0.5000000000000000 | 0.5130262559045230 |
| 0.8285822159283694 | 0.0000000000000000 | 0.5086010504634180 |

|                    |                     |                    |
|--------------------|---------------------|--------------------|
| 0.1361277686606419 | 0.0000000000000000  | 0.5130315100919057 |
| 0.3285799161240430 | 0.5000000000000000  | 0.5086027940091147 |
| 0.0798886007992591 | 0.5000000000000000  | 0.4130136222319095 |
| 0.5798865970207930 | 0.0000000000000000  | 0.4130086516396975 |
| 0.8746864962086320 | 0.0000000000000000  | 0.3574717560594726 |
| 0.3746872380750226 | 0.5000000000000000  | 0.3574763855362318 |
| 0.8084839877908565 | 0.5000000000000000  | 0.2604789274839261 |
| 0.6308585522579770 | 0.0000000000000000  | 0.2574883696471029 |
| 0.1308573659441201 | 0.5000000000000000  | 0.2574908537849279 |
| 0.0692238211485029 | 0.0000000000000000  | 0.1605355722524982 |
| 0.5692271264839133 | 0.5000000000000000  | 0.1605329400624317 |
| 0.8445542676006303 | 0.0000000000000000  | 0.8131105035236058 |
| 0.8473752065750788 | 0.0000000000000000  | 0.6984442922851922 |
| 0.1762957215582607 | 0.0000000000000000  | 0.9502519459121699 |
| 0.5090224395257419 | 0.0000000000000000  | 0.9405727827796021 |
| 0.3445587194039820 | 0.5000000000000000  | 0.8131083131273610 |
| 0.3473791908797700 | 0.5000000000000000  | 0.6984414763880713 |
| 0.6762854535910450 | 0.5000000000000000  | 0.9502552121719433 |
| 0.0090286803360759 | 0.5000000000000000  | 0.9405684706473427 |
| 0.6933788323607920 | 0.5000000000000000  | 0.6994860203892727 |
| 0.6855864973931657 | 0.5000000000000000  | 0.8117752734209087 |
| 0.3305436789080236 | 0.5000000000000000  | 0.956600486073929  |
| 0.0240204347013900 | 0.5000000000000000  | 0.6929407020939569 |
| 0.0078153569674941 | 0.5000000000000000  | 0.8215703851547179 |
| 0.1933801919974687 | 0.0000000000000000  | 0.6994866761605234 |
| 0.1855912500719178 | 0.0000000000000000  | 0.8117739039558858 |
| 0.8305429106050511 | 0.0000000000000000  | 0.9565974533511202 |
| 0.5240233166807772 | 0.0000000000000000  | 0.6929360719784438 |
| 0.5078103394831213 | 0.0000000000000000  | 0.8215716350842869 |
| 0.1693932961816605 | 0.0000000000000000  | 0.0617417866541790 |
| 0.6693920527898070 | 0.5000000000000000  | 0.0617425201098111 |
| 0.9912183920410610 | 0.5000000000000000  | 0.0793272670896769 |
| 0.3365261639774649 | 0.5000000000000000  | 0.0647521548546112 |
| 0.4912130946483882 | 0.0000000000000000  | 0.0793329039261096 |
| 0.8365312195429068 | -0.0000000000000000 | 0.0647472967574179 |
| 0.8536302905795293 | 0.0000000000000000  | 0.5793417799591724 |
| 0.2106438853888785 | 0.0000000000000000  | 0.5617591306877522 |
| 0.3536295128178813 | 0.5000000000000000  | 0.5793428350471629 |
| 0.7106467702401340 | 0.5000000000000000  | 0.5617551316560312 |
| 0.5374614828991277 | 0.0000000000000000  | 0.5648217230803189 |
| 0.0374576550750667 | 0.5000000000000000  | 0.5648267178653078 |
| 0.9266000313099781 | 0.5000000000000000  | 0.4502594925749930 |
| 0.7596234553612085 | 0.0000000000000000  | 0.4566178360855897 |
| 0.6130364420236154 | 0.5000000000000000  | 0.4406943359736974 |
| 0.2596205444666596 | 0.5000000000000000  | 0.4566215728772801 |
| 0.4265972175512177 | 0.0000000000000000  | 0.4502591499300899 |
| 0.1130364617835197 | 0.0000000000000000  | 0.4406984808621490 |
| 0.6945761301249872 | 0.0000000000000000  | 0.3118076410523418 |
| 0.8527254800833070 | 0.5000000000000000  | 0.3216232201707466 |
| 0.5329332560167562 | 0.5000000000000000  | 0.3131617673397393 |
| 0.3527263240605557 | 0.0000000000000000  | 0.3216262384707540 |
| 0.1945746858569229 | 0.5000000000000000  | 0.3118116593663487 |
| 0.0329311739250816 | 0.0000000000000000  | 0.3131616263245431 |
| 0.7593804149925838 | 0.5000000000000000  | 0.1984350911984143 |
| 0.4112891717597145 | 0.5000000000000000  | 0.1995121932694209 |
| 0.2593776497190456 | 0.0000000000000000  | 0.1984400864043376 |
| 0.9112929568544633 | 0.0000000000000000  | 0.1995079316228027 |
| 0.5937112691001123 | 0.0000000000000000  | 0.1929562504727728 |
| 0.0937073922283184 | 0.5000000000000000  | 0.1929592463290744 |

#### 4. (100)-SF 4

(100)SF 4

1.0000000000000000

48.4506950378000028 0.0000000000000000 0.0000000000000000

0.0000000000000000 3.1001288891000001 0.0000000000000000

-0.0021101511000000 -0.0000015765000000 5.9196730666999997

Ga 0

32 48

Direct

0.2265438590000031 0.0003764579999981 0.7522962689999986  
0.4596000909999987 0.5003809930000003 0.7369344829999989  
0.1642120480000031 0.0003318699999966 0.9910647270000013  
0.4765079619999995 0.0003720360000017 0.2530177829999971  
0.3972668649999989 0.5003908280000005 0.5004702210000005  
0.3515586560000017 0.5003949399999996 0.0045817060000033  
0.2892239090000004 0.5003859400000010 0.7679912449999975  
0.4141496720000006 0.0003914269999967 0.0145152719999970  
0.5222844480000006 0.0003685650000023 0.7519161700000012  
0.6471726890000014 0.5002940890000005 0.5007967350000015  
0.6015018220000030 0.5003067849999994 0.9987310770000022  
0.5391696690000032 0.5003562570000000 0.2357728630000011  
0.7096451520000002 0.5002294180000035 0.2629602250000005  
0.5846212510000015 0.0003232859999969 0.5127714870000020  
0.7722019549999999 0.0001977129999986 0.2510598599999980  
0.8346697090000035 0.0001588760000004 0.0132739880000017  
0.7265845539999987 0.0002084710000005 0.7490240340000014  
0.6640821700000004 0.0002736730000024 0.9867909550000036  
0.9766277669999965 0.0001984689999972 0.2499416320000023  
0.8972166180000016 0.5001534820000018 0.0015099479999989  
0.8516064290000003 0.5001537799999980 0.4992600080000003  
0.7891393900000025 0.5001822709999999 0.7370364670000029  
0.9596806169999965 0.5001842980000006 0.7639293670000029  
0.9141566159999996 0.0001596119999974 0.4874989690000007  
0.0222358680000028 0.0002118780000018 0.7529654499999978  
0.1473174540000031 0.5003142360000012 0.5050592420000015  
0.1016584260000002 0.5003020170000028 0.0017037960000010  
0.0391886049999997 0.5002319809999989 0.2390564680000011  
0.2096498009999976 0.5003638270000010 0.2684226630000026  
0.0847333970000008 0.0002801779999970 0.5156707169999990  
0.2723166050000003 0.0003807780000002 0.2518903019999996  
0.3346773390000024 0.0003906210000011 0.4905287329999979  
0.1660787169999978 0.5003271100000006 0.7829021220000030  
0.2484907360000008 0.5003765229999999 0.7542183400000013  
0.2925961319999999 0.0003847460000017 0.5295442939999973  
0.4562301039999994 0.0003828729999995 0.9753649829999986  
0.4177146549999975 0.5003875490000027 0.7775422329999984  
0.2914847429999980 0.0003846910000007 0.9758809209999981  
0.4573358889999994 0.0003789690000033 0.5290164350000026  
0.4160299600000030 0.5003914240000000 0.2227129039999980  
0.3327964839999993 0.5003895159999985 0.2823363239999992  
0.4984540339999981 0.5003703830000035 0.2505866589999997  
0.3734411000000009 0.0003944939999982 0.9953605529999976  
0.3753851649999973 0.0003899350000012 0.5097311740000023  
0.5414390560000015 0.0003583439999986 0.0280364750000004  
0.7078178519999980 0.0002252660000011 0.4712511299999989  
0.5827497840000007 0.5003187060000016 0.7208766339999997  
0.5425481799999972 0.0003472779999996 0.4742633400000003  
0.7060225609999975 0.0002398230000011 0.0252935870000002  
0.6677108410000017 0.5002627969999978 0.2244402019999967  
0.5810545089999977 0.5003310439999993 0.2757354379999981  
0.5003359910000000 0.5003685360000034 0.7503302690000027  
0.6233959200000001 0.0003047430000009 0.0072072359999993  
0.6252909299999985 0.0002951379999985 0.4921901519999992  
0.8328385949999983 0.5001571769999984 0.2215247299999987  
0.7503138180000022 0.5001993779999978 0.2424279299999981  
0.6659287210000002 0.5002771620000033 0.7785862089999966  
0.7484734650000036 0.5002071259999994 0.7576515670000035  
0.7909729479999967 0.0001850740000009 0.5287874939999995  
0.9578514700000014 0.0001872930000033 0.9722211360000017  
0.9159857630000019 0.5001575949999975 0.2792471349999985  
0.7927504780000021 0.0001772809999991 0.9747433659999984  
0.9560736419999998 0.0001784880000031 0.5262269970000020  
0.9177648430000005 0.5001662969999998 0.7252148390000031  
0.8310593369999992 0.5001652839999977 0.7755752799999982  
0.9985132810000010 0.5002000329999987 0.2589048150000011  
0.8734917040000028 0.0001543670000004 0.5079452989999993  
0.8753329520000008 0.0001540169999998 0.9927404519999996  
0.0410153979999990 0.0002271660000019 0.0307133199999967

|                    |                    |                    |
|--------------------|--------------------|--------------------|
| 0.2073803839999968 | 0.0003653050000025 | 0.4761914010000012 |
| 0.0828882899999996 | 0.5002847909999986 | 0.7239403129999999 |
| 0.0428001470000012 | 0.0002430130000022 | 0.4767304359999969 |
| 0.2062792629999990 | 0.0003551069999972 | 0.0299203770000034 |
| 0.1677706389999969 | 0.5003383760000020 | 0.2280949800000016 |
| 0.0811158570000003 | 0.5002671479999989 | 0.2780189510000000 |
| 0.0003506830000006 | 0.5002104639999985 | 0.7438793780000026 |
| 0.1235359530000011 | 0.0003032219999994 | 0.0108498969999999 |
| 0.1254270080000026 | 0.0003122000000033 | 0.4960822760000028 |
| 0.3311110439999965 | 0.5003883239999993 | 0.7274965639999991 |
| 0.2503695790000009 | 0.5003794429999999 | 0.2541206180000017 |

## 5. (001)-SF

(001)SF

1.000000000000000

|                     |                     |                     |
|---------------------|---------------------|---------------------|
| 12.2898233979997968 | 0.0294924248223792  | 0.0473335698621348  |
| 0.0074126599818637  | 3.0611543539484902  | -0.0640620647798825 |
| -3.5280700754955485 | -0.3082474031441104 | 14.2585590140175604 |

Ga O

20 30

Direct

|                    |                    |                    |
|--------------------|--------------------|--------------------|
| 0.6714183539054177 | 0.1070732636683199 | 0.5227252407587157 |
| 0.0967663125084497 | 0.0455257817776767 | 0.3170088184327835 |
| 0.9129326576327764 | 0.9968493460352228 | 0.0802612757641295 |
| 0.5967662103150480 | 0.5455268086691626 | 0.3170088912218964 |
| 0.4129325787617581 | 0.4968503096915029 | 0.0802617547223743 |
| 0.1647089637908809 | 0.5040670630249507 | 0.1249093774868158 |
| 0.8451037227144973 | 0.5314173421896654 | 0.2718395800943346 |
| 0.6647087059321111 | 0.0040678350129539 | 0.1249093617861621 |
| 0.3451032835355193 | 0.0314175333278052 | 0.2718398361289385 |
| 0.0979658427367005 | 0.9625504097200293 | 0.9185452300384082 |
| 0.9162656038098023 | 0.9210111671204793 | 0.6855972419808759 |
| 0.5979657330074886 | 0.4625519548988712 | 0.9185451927074632 |
| 0.4162644301268368 | 0.4210075552776386 | 0.6855967377472733 |
| 0.1659750270575978 | 0.4267621966330546 | 0.7255918334520863 |
| 0.8451932527633690 | 0.4552539752332910 | 0.8745438238005002 |
| 0.6659744457985517 | 0.9267610251367530 | 0.7255912695588947 |
| 0.3451937034417525 | 0.9552546674841672 | 0.8745441036120223 |
| 0.9189391648428522 | 0.0474467810015787 | 0.4769837782816656 |
| 0.4189384523427092 | 0.5474484194286967 | 0.4769832672739320 |
| 0.1714180525902852 | 0.6070726433126593 | 0.5227253377793922 |
| 0.1761804113439052 | 0.9874010247051270 | 0.0439826765959026 |
| 0.8350370639297575 | 0.0472772012397493 | 0.3534175126080918 |
| 0.6761800040836460 | 0.4874020260522124 | 0.0439826971426784 |
| 0.3350370984709085 | 0.5472778281907679 | 0.3534183670082222 |
| 0.1772204635674010 | 0.0235573351409909 | 0.2221680808492596 |
| 0.8328038655561938 | 0.0137138539536314 | 0.1754852352425658 |
| 0.6772207879315393 | 0.5235577972201123 | 0.2221681267012891 |
| 0.3328042400607544 | 0.5137139739936868 | 0.1754856597801599 |
| 0.0019815787139900 | 0.4993978119749763 | 0.1009706679087701 |
| 0.0081494940846977 | 0.5428043664164077 | 0.2972748750595218 |
| 0.5019814391272358 | 0.9993985653933158 | 0.1009716213935294 |
| 0.5081501150103882 | 0.0428054821178433 | 0.2972760259667691 |
| 0.1738146251965662 | 0.0792773954708276 | 0.4427958041809443 |
| 0.8331481118640796 | 0.9723360181486197 | 0.9557611084330485 |
| 0.6738160725207747 | 0.5792784301156317 | 0.4427962927466387 |
| 0.3331490427956905 | 0.4723375394639984 | 0.9557616020583330 |
| 0.1776550177370729 | 0.9479311238562743 | 0.8230204636854480 |
| 0.8339017552368959 | 0.9335574415601704 | 0.7786780878774445 |
| 0.6776547465303340 | 0.4479297537830093 | 0.8230200559732225 |
| 0.3339021538708234 | 0.4335578527985912 | 0.7786783407866215 |
| 0.0045984339548612 | 0.4251648855354733 | 0.7039838947479605 |
| 0.0084918695726262 | 0.4603100819959877 | 0.9000107908762988 |
| 0.5045986342257134 | 0.9251609385761032 | 0.7039831843908954 |
| 0.5084920867579263 | 0.9603118186662217 | 0.9000105175866502 |
| 0.1751112132510003 | 0.9061340429891656 | 0.6424623199438705 |
| 0.8316313381304358 | 0.0043737798600387 | 0.5648338749537558 |
| 0.6751112414410732 | 0.4061328522434629 | 0.6424622525532461 |
| 0.3316313297811653 | 0.5043707031491541 | 0.5648342880966936 |

0.0079450113150584 0.5490056155286719 0.5004820009680300  
0.5079462673230589 0.0490062022153366 0.5004815342554374

## 6. (-201)-SF 1

(-201)SF 1

1.0000000000000000

14.8357048855545184 0.0254701000891281 0.3351808754635127  
0.0051577133012199 3.0930308211891546 0.0178715866695515  
12.9010660171004208 0.1196122076950558 17.0187771825611769

Ga O

28 42

Direct

0.8794261100328115 0.0418630809766338 0.5589703427296885  
0.9098211294447153 0.9912054049931892 0.1144007199938713  
0.6436374736457124 0.9937057768915822 0.2945096430700151  
0.0919325465350693 0.0005740872902797 0.1795447235163366  
0.3526142755846708 0.0008417226521688 0.0032361278227915  
0.8830085821005288 0.9791482756404515 0.4080471955060593  
0.4098211594447174 0.4912054049931961 0.1144007199938713  
0.1436375036457148 0.4937057768915821 0.2945096430700151  
0.5919325765350717 0.5005740872902799 0.1795447235163366  
0.8526143045846767 0.5008417226521688 0.0032361278227915  
0.3830085821005283 0.4791482756404515 0.4080471955060593  
0.8321052473431929 0.4909040546236444 0.2868951594813731  
0.1695172384615350 0.4999323243317761 0.0038675317624111  
0.3321052473431926 0.9909040546236443 0.2868951594813731  
0.6695172534615330 -0.0000676756682238 0.0038675317624111  
0.6875639581976738 0.0127674984553998 0.7227889578208426  
0.1525189997272875 0.0324154930686424 0.5877664420727446  
0.9300835538380534 0.0086558710216548 0.8271630563312298  
0.3794260800328160 0.5418630609766323 0.5589703427296885  
0.1875639281976713 0.5127674784553985 0.7227889578208426  
0.6525190217272890 0.5324154730686409 0.5877664420727446  
0.4300835538380533 0.5086558510216531 0.8271630563312298  
0.6126758954606114 0.5065571484320220 0.8923991320182512  
0.8854978718863658 0.5181111093741736 0.7091870366532215  
0.1363104931342816 0.5670243457784275 0.4495214296681921  
0.1126759104606090 0.0065571684320238 0.8923991320182512  
0.3854979018863754 0.0181111293741753 0.7091870366532215  
0.6363104931342817 0.0670243657784293 0.4495214296681921  
0.8143348088762730 0.9947077080417049 0.3555678146224646  
0.8208787586319606 0.9852284257956554 0.2287009906339175  
0.1592383134117572 0.0559097824500100 0.4908348027183496  
0.1785002455165526 0.9983764058916120 0.0663231636964244  
0.3143348378762719 0.4947077080417049 0.3555678146224646  
0.3208787586319605 0.4852284257956555 0.2287009906339175  
0.6592383134117573 0.5559097824500101 0.4908348027183496  
0.6785002605165577 0.4983764058916121 0.0663231636964244  
0.6584033245013415 0.4985256761135751 0.2310235410732625  
0.6592033859994053 0.4456669537352599 0.3569412840177518  
0.0001317198003527 0.4925964790990910 0.0812436988909141  
0.3357153093220314 0.4967048956272972 0.0688140872545107  
0.2880384244367561 0.5205472943082381 0.5210434335868115  
-0.0004158219338741 0.4989736739916510 0.2166407684109870  
0.9747783103356042 0.4816865620011025 0.3688324159562791  
0.1584032945013392 0.9985256761135753 0.2310235410732625  
0.1592034149994044 0.9456669537352602 0.3569412840177518  
0.5001317198003601 0.9925964790990912 0.0812436988909141  
0.8357153393220340 0.9967048956272971 0.0688140872545107  
0.7880384244367560 0.0205472943082379 0.5210434335868115  
0.4995841780661259 0.9989736739916580 0.2166407684109870  
0.4747782503356062 0.9816865620011023 0.3688324159562791  
0.8617990517206924 0.0137638282993660 0.7778151742690632  
0.8615391464639020 0.0211143963258246 0.6567581441199274  
0.1828657143756448 0.0038437576235815 0.9411872524123794  
0.5205944213415279 0.0050846137568962 0.9306164609914966  
0.3617990817206878 0.5137638082993712 0.7778151742690632  
0.3615391764638977 0.5211143763258300 0.6567581441199274  
0.6828657143756447 0.5038437376235797 0.9411872524123794

|                    |                    |                    |
|--------------------|--------------------|--------------------|
| 0.0205944043415301 | 0.5050845937568949 | 0.9306164609914966 |
| 0.7145595544184603 | 0.5130827523030496 | 0.6490269184347512 |
| 0.6989854031128563 | 0.5114634009463043 | 0.7802598779256295 |
| 0.9729812703829672 | 0.5414538871701484 | 0.5061947078252653 |
| 0.3427822936966538 | 0.5040374319742719 | 0.9419976296974337 |
| 0.0527174826508952 | 0.5294521645844160 | 0.6361551157255689 |
| 0.0208154935457127 | 0.5095934294308874 | 0.7942252232897483 |
| 0.2145595394184555 | 0.0130827723030512 | 0.6490269184347512 |
| 0.1989853731128538 | 0.0114634209463060 | 0.7802598779256295 |
| 0.4729812703829671 | 0.0414539071701502 | 0.5061947078252653 |
| 0.8427822936966540 | 0.0040374519742666 | 0.9419976296974337 |
| 0.5527174826508953 | 0.0294521845844178 | 0.6361551157255689 |
| 0.5208154645457138 | 0.0095934494308891 | 0.7942252232897483 |
